# Supplementary material
Source: PubMed Central journal article supplement (PMC4793680)
Supplement: meha017513.ww1_default.pdf [file meha017513.ww1_default.pdf]

## Appendix

Table 1. International Statistical Classification of Diseases and Related Health Problems (ICD-10CA), and the Canadian Classification of Interventions (CCI) diagnosis/procedure codes used in the study.

| Diagnosis/Procedure code                                                      | ICD-10                  | CCI                                                                                                                  |
|-------------------------------------------------------------------------------|-------------------------|----------------------------------------------------------------------------------------------------------------------|
| Postpartum hemorrhage                                                         | O720- O723              |                                                                                                                      |
| Due to retained placenta                                                      | O720                    |                                                                                                                      |
| Atonic postpartum hemorrhage                                                  | O721                    |                                                                                                                      |
| Secondary postpartum hemorrhage                                               | O722                    |                                                                                                                      |
| Due to coagulation defects                                                    | O723                    |                                                                                                                      |
| Blood transfusion                                                             |                         | 1LZ19HHU1; 1LZ19HHU9;<br>1LZ19HMU1; 1LZ19HMU9                                                                        |
| Hysterectomy                                                                  |                         |                                                                                                                      |
| Cesarean hysterectomy                                                         |                         | 5MD60KE; 5MD60RC; 5MD60CB;<br>5MD60RD                                                                                |
| Partial or total excision of uterus and surrounding structures, open approach |                         | 1RM87LAGX; 1RM89LA (without<br>1PL74; 1RS80; 1RS74)                                                                  |
| Other procedures to control bleeding                                          |                         |                                                                                                                      |
| Suturing of uterus, e.g. b-lynch suture                                       |                         | 5PC91LA                                                                                                              |
| Control of postpartum hemorrhage by ligation of pelvic vessels                |                         | 1KT51                                                                                                                |
| Control of postpartum hemorrhage by embolization of pelvic vessels            |                         | 1RM13                                                                                                                |
| Acute Renal Failure                                                           |                         |                                                                                                                      |
| Postpartum acute renal failure                                                | O904                    |                                                                                                                      |
| Post-procedural renal failure                                                 | N990                    |                                                                                                                      |
| Acute renal failure                                                           | N17                     |                                                                                                                      |
| Unspecified kidney failure                                                    | N19                     |                                                                                                                      |
| Dialysis                                                                      |                         | Z491                                                                                                                 |
| Induction of labor                                                            |                         | 5AC30ALI2; 5AC30CAI2;<br>5AC30GUI2; 5AC30HAI2;<br>5AC30YAI2; 5AC30YBI2;<br>5AC30ZZI2, 5AC30AP, (since 2006)<br>5AC30 |
| Cesarean delivery                                                             | 5MD60                   |                                                                                                                      |
| Placenta previa, antepartum hemorrhage                                        | O44, O46                |                                                                                                                      |
| Hypertensive disorders                                                        |                         |                                                                                                                      |
| Pre-existing hypertension complicating pregnancy                              | O10                     |                                                                                                                      |
| Pre-existing hypertensive disorder with superimposed proteinuria              | O11                     |                                                                                                                      |
| Gestational hypertension without significant Proteinuria                      | O13                     |                                                                                                                      |
| Gestational hypertension with significant proteinuria                         | O14                     |                                                                                                                      |
| Eclampsia                                                                     | O15                     |                                                                                                                      |
| Unspecified maternal hypertension                                             | O16                     |                                                                                                                      |
| Gestational edema and proteinuria                                             | O12                     |                                                                                                                      |
| Diabetes mellitus                                                             | E10, E11, E13, E14, O24 |                                                                                                                      |
| Sepsis                                                                        | O753, O85               |                                                                                                                      |
| Other puerperal infection                                                     | O86                     |                                                                                                                      |
| Placental abruption                                                           | O45                     |                                                                                                                      |
| Obstetric shock                                                               | O751,T805,T886          |                                                                                                                      |
| Uterine rupture                                                               | O710, O711              |                                                                                                                      |
| Polyhydramnios                                                                | O40                     |                                                                                                                      |
| Cardiac failure                                                               | O754,O742,O291, I50     |                                                                                                                      |
| Obesity                                                                       | E66                     |                                                                                                                      |
| Chronic kidney disease                                                        | N18                     |                                                                                                                      |
| Pulmonary edema                                                               | J81                     |                                                                                                                      |

Table 2. Results of logistic regression modeling showing effects of year of delivery and risk factors on obstetric acute renal failure (ARF) among women with gestational hypertension and proteinuria (n=24,851), Canada (excluding Quebec), 2003 to 2010.

|                                       |             | ARF per<br>10,000<br>deliveries | Unadjusted odds ratio<br>(95% confidence interval) | Adjusted odds ratio (95%<br>confidence interval) * |
|---------------------------------------|-------------|---------------------------------|----------------------------------------------------|----------------------------------------------------|
| Period                                | 2003-2004   | 45.5                            | Reference                                          | Reference                                          |
|                                       | 2005-2006   | 72.1                            | 1.59 (0.98-2.59)                                   | 1.71 (1.04-2.79)                                   |
|                                       | 2007-2008   | 74.7                            | 1.65 (1.02-2.65)                                   | 1.81 (1.12-2.94)                                   |
|                                       | 2009-2010   | 109.6                           | 2.42 (1.55-3.81)                                   | 2.71 (1.71-4.29)                                   |
| Atonic postpartum hemorrhage          |             | 145.3                           | 2.07 (1.37-3.11)                                   | 2.47 (1.61-3.79)                                   |
| Non-atonic postpartum hemorrhage      |             | 353.4                           | 5.20 (3.24-8.32)                                   | 7.14 (4.29-11.87)                                  |
| Maternal age (in years)               |             |                                 |                                                    |                                                    |
|                                       | <20         | 35.8                            | 0.65 (0.27-1.60)                                   | 0.68 (0.27-1.67)                                   |
|                                       | 20-24       | 54.8                            | Reference                                          | Reference                                          |
|                                       | 25-29       | 74.1                            | 1.36 (0.83-2.22)                                   | 1.26 (0.77-2.07)                                   |
|                                       | 30-34       | 83.0                            | 1.52 (0.94-2.46)                                   | 1.27 (0.77-2.07)                                   |
|                                       | 35-39       | 105.3                           | 1.93 (1.16-3.23)                                   | 1.47 (0.87-2.50)                                   |
|                                       | ≥40         | 91.1                            | 1.67 (0.79-3.52)                                   | 1.09 (0.51-2.35)                                   |
| Parity                                | 1           | 84.5                            | Reference                                          | Reference                                          |
|                                       | Nulliparous | 100.9                           | 0.86 (0.59-1.26)                                   | 1.04 (0.70-1.54)                                   |
|                                       | 2-4         | 70.3                            | 0.86 (0.59-1.26)                                   | 0.75 (0.39-1.47)                                   |
|                                       | Missing     | 51.5                            | 0.52 (0.33-0.83)                                   | 0.57 (0.35-0.92)                                   |
| Multi-fetal gestation                 |             | 178.0                           | 2.57 (1.69-3.89)                                   | 1.73 (1.11-2.68)                                   |
| Diabetes                              |             | 102.5                           | 1.40 (0.92-2.12)                                   | 1.19 (0.77-1.84)                                   |
| Gestational edema and proteinuria     |             | 363.6                           | 4.94 (1.20-20.4)                                   | 5.15 (1.20-22.11)                                  |
| Sepsis                                |             | 400.0                           | 5.50 (2.00-15.12)                                  | 2.83 (0.95-8.44)                                   |
| Other puerperal infection             |             | 445.1                           | 6.48 (3.78-11.10)                                  | 5.10 (2.88-9.04)                                   |
| Antepartum hemorrhage/placenta previa |             | 253.2                           | 3.45 (1.51-7.86)                                   | 1.50 (0.63-3.57)                                   |
| Placental abruption                   |             | 305.7                           | 4.48 (2.83-7.09)                                   | 4.38 (2.72-7.05)                                   |
| Polyhydramnios                        |             | 263.2                           | 3.58 (1.45-8.80)                                   | 3.45 (1.37-8.71)                                   |
| Induction of labour                   |             | 43.1                            | 0.38 (0.27-0.51)                                   | 0.48 (0.34-0.68)                                   |
| Cesarean delivery                     |             | 103.8                           | 2.46 (1.77-3.43)                                   | 1.78 (1.22-2.59)                                   |
| Uterine rupture                       |             | 416.7                           | 5.67 (0.76-42.19)                                  | 2.45 (0.31-19.68)                                  |
| Cardiac failure                       |             | 567.4                           | 8.11 (3.91, 16.79)                                 | 4.46 (2.08-9.58)                                   |

\*Adjusted for all variables in the table.

Table 3. Results of logistic regression showing effects of year of delivery and risk factors on obstetric acute renal failure (ARF) among women without hypertensive disorders of pregnancy (n=2,058,935), Canada (excluding Quebec), 2003 to 2010.

|                                       |             | ARF per<br>10 000 deliveries | Unadjusted odds ratio<br>(95% confidence interval) | Adjusted odds ratio (95%<br>confidence interval)* |
|---------------------------------------|-------------|------------------------------|----------------------------------------------------|---------------------------------------------------|
| Period                                | 2003-2004   | 0.77                         | Reference                                          | Reference                                         |
|                                       | 2005-2006   | 0.99                         | 1.28 (0.84-1.96)                                   | 1.35 (0.88-2.07)                                  |
|                                       | 2007-2008   | 0.91                         | 1.19 (0.77-1.82)                                   | 1.19 (0.77-1.84)                                  |
|                                       | 2009-2010   | 0.93                         | 1.21 (0.79-1.86)                                   | 1.12 (0.72-1.72)                                  |
| Atonic postpartum hemorrhage          |             | 4.3                          | 5.66 (3.96-8.08)                                   | 5.23 (3.55-7.68)                                  |
| Non-atonic postpartum hemorrhage      |             | 13.7                         | 18.04 (12.27-26.53)                                | 18.36 (11.87-28.39)                               |
| Maternal age (in years)               |             |                              |                                                    |                                                   |
|                                       | <20         | 0.51                         | 0.75 (0.29-1.98)                                   | 0.61 (0.23-1.63)                                  |
|                                       | 20-24       | 0.69                         | Reference                                          | Reference                                         |
|                                       | 25-29       | 0.76                         | 1.11 (0.67-1.83)                                   | 1.05 (0.64-1.75)                                  |
|                                       | 30-34       | 0.88                         | 1.29 (0.80-2.09)                                   | 1.07 (0.65-1.75)                                  |
|                                       | 35-39       | 1.4                          | 2.01 (1.21-3.33)                                   | 1.46 (0.86-2.47)                                  |
|                                       | ≥40         | 1.9                          | 2.84 (1.41-5.71)                                   | 1.41 (0.67-2.98)                                  |
| Parity                                | 1           | 1.14                         | Reference                                          | Reference                                         |
|                                       | Nulliparous | 0.57                         | 1.85 (1.25-2.75)                                   | 1.78 (1.18-2.69)                                  |
|                                       | 2-4         | 0.95                         | 1.56 (0.95-2.56)                                   | 1.47 (0.89-2.44)                                  |
|                                       | >5          | 2.2                          | 3.52 (1.38-8.98)                                   | 2.29 (0.85-6.15)                                  |
|                                       | Missing     | 0.84                         | 1.39 (0.88-2.19)                                   | 1.27 (0.80-2.02)                                  |
| Multi-fetal gestation                 |             | 5.4                          | 6.38 (3.70-11.00)                                  | 2.70 (1.53-4.76)                                  |
| Diabetes                              |             | 2.6                          | 3.13 (2.05-4.77)                                   | 2.14 (1.37-3.32)                                  |
| Gestational edema and proteinuria     |             | 18.3                         | 20.74 (7.70-55.91)                                 | 10.64 (3.75-30.23)                                |
| Sepsis                                |             | 76.0                         | 93.19 (56.50-153.71)                               | 15.63 (8.64-28.29)                                |
| Other puerperal infection             |             | 25.7                         | 31.63 (19.67-50.86)                                | 6.53 (3.77-11.31)                                 |
| Antepartum hemorrhage/placenta previa |             | 7.1                          | 8.45 (4.90-14.58)                                  | 2.14 (1.17-3.89)                                  |
| Placental abruption                   |             | 8.6                          | 10.53 (6.62-16.75)                                 | 5.17 (3.14-8.52)                                  |
| Polyhydramnios                        |             | 6.2                          | 7.05 (3.13-15.90)                                  | 2.97 (1.24-7.10)                                  |
| Induction of labour                   |             | 1.25                         | 1.53 (1.10-2.11)                                   | 1.53 (1.09-2.15)                                  |
| Cesarean delivery                     |             | 1.96                         | 3.77 (2.82-5.04)                                   | 2.94 (2.13-4.07)                                  |
| Uterine rupture                       |             | 14.9                         | 16.75 (5.35-52.40)                                 | 3.50 (1.03-11.85)                                 |
| Cardiac failure                       |             | 137.5                        | 172.73 (108.31-275.49)                             | 26.92 (15.53-46.68)                               |

\*Adjusted for all variables in the table.
